# Supplementary material for: Matrix-assisted laser desorption/ionization mass spectrometry with re-engineered 2,5-dihydroxybenzoic acid derivativeElectronic supplementary information (ESI) available: Synthesis of M class matrices. See http://www.rsc.org/suppdata/an/b3/b309386g/
Source: Royal Society of Chemistry journal article supplement (doi:10.1039/b309386g), 2003-01-01
Supplement: b309386g.doc [file b309386g.doc]

**Synthesis of M class matrices**

Experimental

*1-Hexene-6-(2,5-dihydroxy)benzoate (M2)*

2,5-Dihydroxybenzoic acid **172** (0.052 g, 3.4x10-4 mol, 1.1 eq), sodium hydrogen carbonate (0.052 g, 6.2x10-4 mol, 2 eq) and 6-bromo-1-hexene **173a** (0.050 g, 3.1x10-4 mol, 1 eq) were dissolved in DMF (1 mL) at room temperature and slowly heated up to 60 oC. After 30 minutes the reaction mixture was allowed to cool down to room temperature and was separated between 1M HCl-solution (5 mL) and DCM (10 mL). The organic layer was dried and concentrated under reduced pressure to give the oily product.

The product was isolated by flash column chromatography (25 mL silica gel, eluent ethyl acetate) to give the pure product (Yield = 0.059 g, 90% in ethyl acetate, 2.25x10-4 mol, 72%).

Rf 0.35 (ethyl acetate).

1H-NMR: (300 MHz, CDCl3); 1.54 (2 H, qi, J = 7.1, CH2CH2CH=CH2), 1.78 (2 H, qi, J = 6.6, CH2CH2CH2CH=CH2), 2.12 (2 H, q, J = 7.1, CH2CH=CH2), 4.33 (2 H, t, J = 6.6, CO2CH2), 4.99 (1 H, ddt, J = 10.3, 2.1, 1.3, CH=CH2), 5.04 (1 H, ddd, J = 17.1, 2.1, 1.3, CH=CH2), 5.51 (1 H, bs, OH), 5.81 (1 H, ddt, J = 17.1, 10.3, 6.6, CH=CH2), 6.87 (1 H, dd, J = 8.9, 0.4, ArH), 7.01 (1 H, dd, J = 8.9, 3.0, ArH), 7.30 (1 H, d, J = 3.0, ArH), 10.44 (1 H, s, OH).

13C-NMR: (75 MHz, CDCl3); 21.5, 25.6, 33.6, 65.8, 112.8, 115.1, 115.5, 118.8, 124.4, 138.5, 148.3, 156.1, 170.2.

*1-Iodohexadecane* 189 (BRN = 1748533)

To a solution of imidazole (0.50 g, 7.3x10-3 mol, 2.7 eq) and triphenylphosphine (0.70 g, 2.7x10-3 mol, 1.0 eq) in DCM (10 mL) at 0 oC was added iodine (0.67 g, 2.7x10-3 mol, 1.0 eq) as a solid. After 10 minutes stirring at 0 oC the solution of 1-hexadecanol **174b** (0.68 g, 95%, 2.7x10-3 mol, 1.0 eq) in DCM (10 mL) was added slowly and the mixture was allowed to warm up to room temperature over 12 hours. The solvents were evaporated under reduced pressure to give the crude product.

The product was isolated by flash column chromatography (25 mL silica gel, eluent DCM) to give the pure product (Yield = 0.765 g, 2.17x10-3 mol, 80%) as a colourless oil which crystallised upon standing.

Rf 0.87 (DCM).

1H-NMR: (300 MHz, CDCl3); 0.88 (3 H, t, J = 7.0, CH2CH3), 1.26 (26 H, bs, (CH2)13CH2CH2I), 1.82 (2 H, qi, J = 7.0, CH2CH2I), 3.19 (2 H, t, J = 7.0, CH2CH2I).

13C-NMR: (75 MHz, CDCl3); 7.8, 14.5, 23.1, 28.9, 29.8, 29.8, 29.9, 30.1, 30.9, 32.3, 34.0.

*Hexadecane-(2,5-dihydroxy)benzoate (M4)*

2,5-Dihydroxybenzoic acid **172** (0.35 g, 2.3x10-3 mol, 1.1 eq), sodium hydrogen carbonate (0.35 g, 4.2x10-3 mol, 2 eq) and 1-Iodohexadecane **173b** (0.734 g, 2.1x10-3 mol, 1 eq) were dissolved in DMF (15 mL) at room temperature and slowly heated up to 60 oC. After 1 hour the reaction mixture was allowed to cool down to room temperature and was separated between 1M HCl-solution (25 mL) and DCM (50 mL). The organic layer was dried and concentrated under reduced pressure to give the oily product.

The product was isolated by flash column chromatography (25 mL silica gel, eluent hexane / ethyl acetate 4:1) to give the pure product (Yield = 0.559 g, 56% in ethyl acetate, 8.3x10-4 mol, 40%) as a white solid.

Rf 0.42 (hexane / ethyl acetate 4:1).

1H-NMR: (300 MHz, CDCl3); 0.88 (3 H, t, J = 7.0, CH2CH3), 1.26 (26 H, bs, (CH2)13CH2CH2O), 1.77 (2 H, qi, J = 6.7, CH2CH2O), 4.33 (2 H, t, J = 6.7, CH2CH2O), 6.88 (1 H, d, J = 8.9, ArH), 7.01 (1 H, dd, J = 8.9, 3.0, ArH), 7.29 (1 H, d, J = 3.0, ArH), 10.41 (1 H, s, ArOH).

*1-Iodoocta-9-decene* 190 (BRN = 1772717)

To a solution of imidazole (0.50 g, 7.3x10-3 mol, 2.7 eq.) and triphenylphosphine (0.70 g, 2.7x10-3 mol, 1.0 eq) in DCM (10 mL) at 0 oC was added the iodine (0.67 g, 2.7x10-3 mol, 1.0 eq) as solid. After 10 minutes stirring at 0 oC the solution of oleyl alcohol **174c** (1 mL, 85%, 2.7x10-3 mol, 1.0 eq) in DCM (10 mL) was added slowly and the mixture was allowed to warm up to room temperature over 1 hour. The solvents were evaporated under reduced pressure to give the crude product.

The product was isolated by flash column chromatography (25 mL silica gel, eluent DCM) to give the pure product (Yield = 0.924 g, 93% in DCM, 2.27x10-3 mol, 84%) as a colourless oil.

Rf 0.85 (DCM).

1H-NMR: (300 MHz, CDCl3); 0.88 (3 H, t, J = 6.7, CH2CH3), 1.27 (22 H, bs, CH3(CH2)6CH2CHCHCH2(CH2)5CH2CH2I), 1.82 (2 H, qi, J = 7.1, CH2CH2I), 2.00 (4 H, m, CH2CHCHCH2), 3.19 (2 H, t, J = 7.1, CH2CH2I), 5.35 (2 H, m, CH=CH)

13C-NMR: (75 MHz, CDCl3); 7.7, 14.5, 23.1, 27.6, 27.6, 28.9, 29.6, 29.7, 29.9, 30.1, 30.2, 30.9, 32.3, 33.0, 34.0, 130.2, 130.4.

## *Octa-9-decene-(2,5-dihydroxy)benzoate (M6)*

2,5-Dihydroxybenzoic acid **172** (0.38 g, 2.4x10-3 mol, 1.1 eq), sodium hydrogen carbonate (0.37 g, 4.4x10-3 mol, 2 eq) and 1-Iodoocta-9-decene **173c** (0.901 g, 93%, 2.2x10-3 mol, 1 eq) were dissolved in DMF (15 mL) at room temperature and slowly heated up to 60 oC. After 1 hour the reaction mixture was allowed to cool down to room temperature and was separated between 1M HCl-solution (25 mL) and DCM (50 mL). The organic layer was dried and concentrated under reduced pressure to give the oily product.

The product was isolated by flash column chromatography (25 mL silica gel, eluent hexane / ethyl acetate, 4:1) to give the pure product (Yield = 0.345 g, 8.5x10-4 mol, 39%) as a colourless oil which gave white crystals upon standing.

Rf 0.40 (hexane / ethyl acetate 4:1).

1H-NMR: (300 MHz, CDCl3); 0.88 (3 H, t, J = 6.6, CH2CH3), 1.29 (22 H, bs, CH3(CH2)6CH2CHCHCH2(CH2)5CH2CH2O), 1.76 (2 H, qi, J = 6.7, CH2CH2O), 2.02 (4 H, m, CH2CH=CHCH2), 4.32 (2 H, t, J = 6.7, CH2CH2O), 4.77 (1 H, bs, ArOH), 5.35 (2 H, m, CH=CH), 6.88 (1 H, d, J = 9.0, ArH), 7.01 (1 H, dd, J = 9.0, 3.1, ArH), 7.29 (1 H, d, J = 3.1, ArH), 10.43 (1 H, bs, ArOH).

13C-NMR: (75 MHz, CDCl3); 14.5, 23.1, 26.3, 27.6, 27.6, 28.9, 29.6, 29.7, 29.8, 29.9, 30.1, 30.2, 32.3, 33.0, 66.0, 112.8, 115.1, 118.9, 124.3, 130.2, 130.4, 148.0, 156.3, 164.2, 170.2.

Supplementary Graph 1:

Reflective Optical Micrograph of 2,5-dihydroxy benzoic acid (matrix) and a red dye (a disperse red analogue).

Supplementary Graph 2:

Reflective Optical Micrograph of M6 (matrix) and a red dye (a disperse red analogue).

Supplementary Graph 3:

Reflective Optical Micrograph of 2,5-dihydroxy benzoic acid (matrix) and a peptide that is coupled to a red dye (a disperse red analogue). The DHB crystals can be seen at the lower and bottom corner while the protein is in the middle.

Supplementary Graph 4:

Reflective Optical Micrograph of M6 (matrix) and a peptide that is coupled to a red dye (a disperse red analogue).

Supplementary Table 1:

The sodiated pseudo-molecular peak intensity for the 22-mer of polyethylene glycol [PEG22+Na]+, along with laser fluence (LP for the 22-mer), the minimum oligomer detected in mass (min), the maximum oligomer detected in mass (max) and the peak envelope (max - min, m).

Supplementary Table 2:

The sodiated pseudo-molecular peak intensity for the 8-mer of polymethacrylate [PMMA8+Na]+, along with laser fluence (LP for the 8-mer), the minimum oligomer detected in mass (min), the maximum oligomer detected in mass (max) and the peak envelope (max - min, m).

Supplementary Table 3:

The protonated and sodiated pseudo-molecular peak intensity for substance P [SubP+Na]+, with M6 as matrix in different solvent formulations. The different solvent formulations were: M6 in (chloroform); (1:1 MeOH/H2O); (1:1 AcN/H2O); (tetrahydrofuran) and (Isooctane).

Supplementary Table 4:

The effect of either pre-mixing or pipetting a droplet of matrix solution and the effect on the protonated and sodiated peak intensity for substance P (SubP) and beta-cyclodextrin (BCD) for the matrices sDHB and M6. A drop was matrix was pipetted onto a metal slide and before it was dried, another analyte drop was placed on top of it, which mixed to form a larger droplet, which was allowed to dry at room temperature.

Supplementary Figure 1:

Positive-linear mode of polymethacrylate with M2 as matrix. M2-PMMA ratio 800:1. One hundred summed scans.

Supplementary Figure 2:

Positive-linear mode of polymethacrylate with M2 as matrix and iodine (10% v/v). M2I-PMMA ratio 1000:1. One hundred summed scans.

Supplementary Figure 3:

Positive-linear mode of ubiquitine with 2,5-dihydroxy benzoic acid (DHB) as matrix. DHB-Ubiquitin ratio 2000:1. One hundred summed scans.

Supplementary Figure 4:

Positive-linear mode of PS2W (membrane protein) with 2,5-dihydroxybenzoic acid (DHB) as matrix. [DHB] = 0.1M in ethyl acetate, 2mg/ml of PS2W in 1:1 MeOH/H2O. Two hundred summed scans. Low mass region is shown in insert.

Supplementary Figure 5:

Positive-linear mode of PS2W (membrane protein) with 2,5-dihydroxybenzoic acid (DHB) with aurintricarboxylic acid (M552 co-matrix) at 10% v/v as binary-matrix. [Matrix] = 0.1M in ethyl acetate, 2mg/ml of PS2W in 1:1 MeOH/H2O. Two hundred summed scans. Low [A] and high [B] mass regions shown in insert.
